# Supplementary material
Source: PubMed Central journal article supplement (PMC3762925)

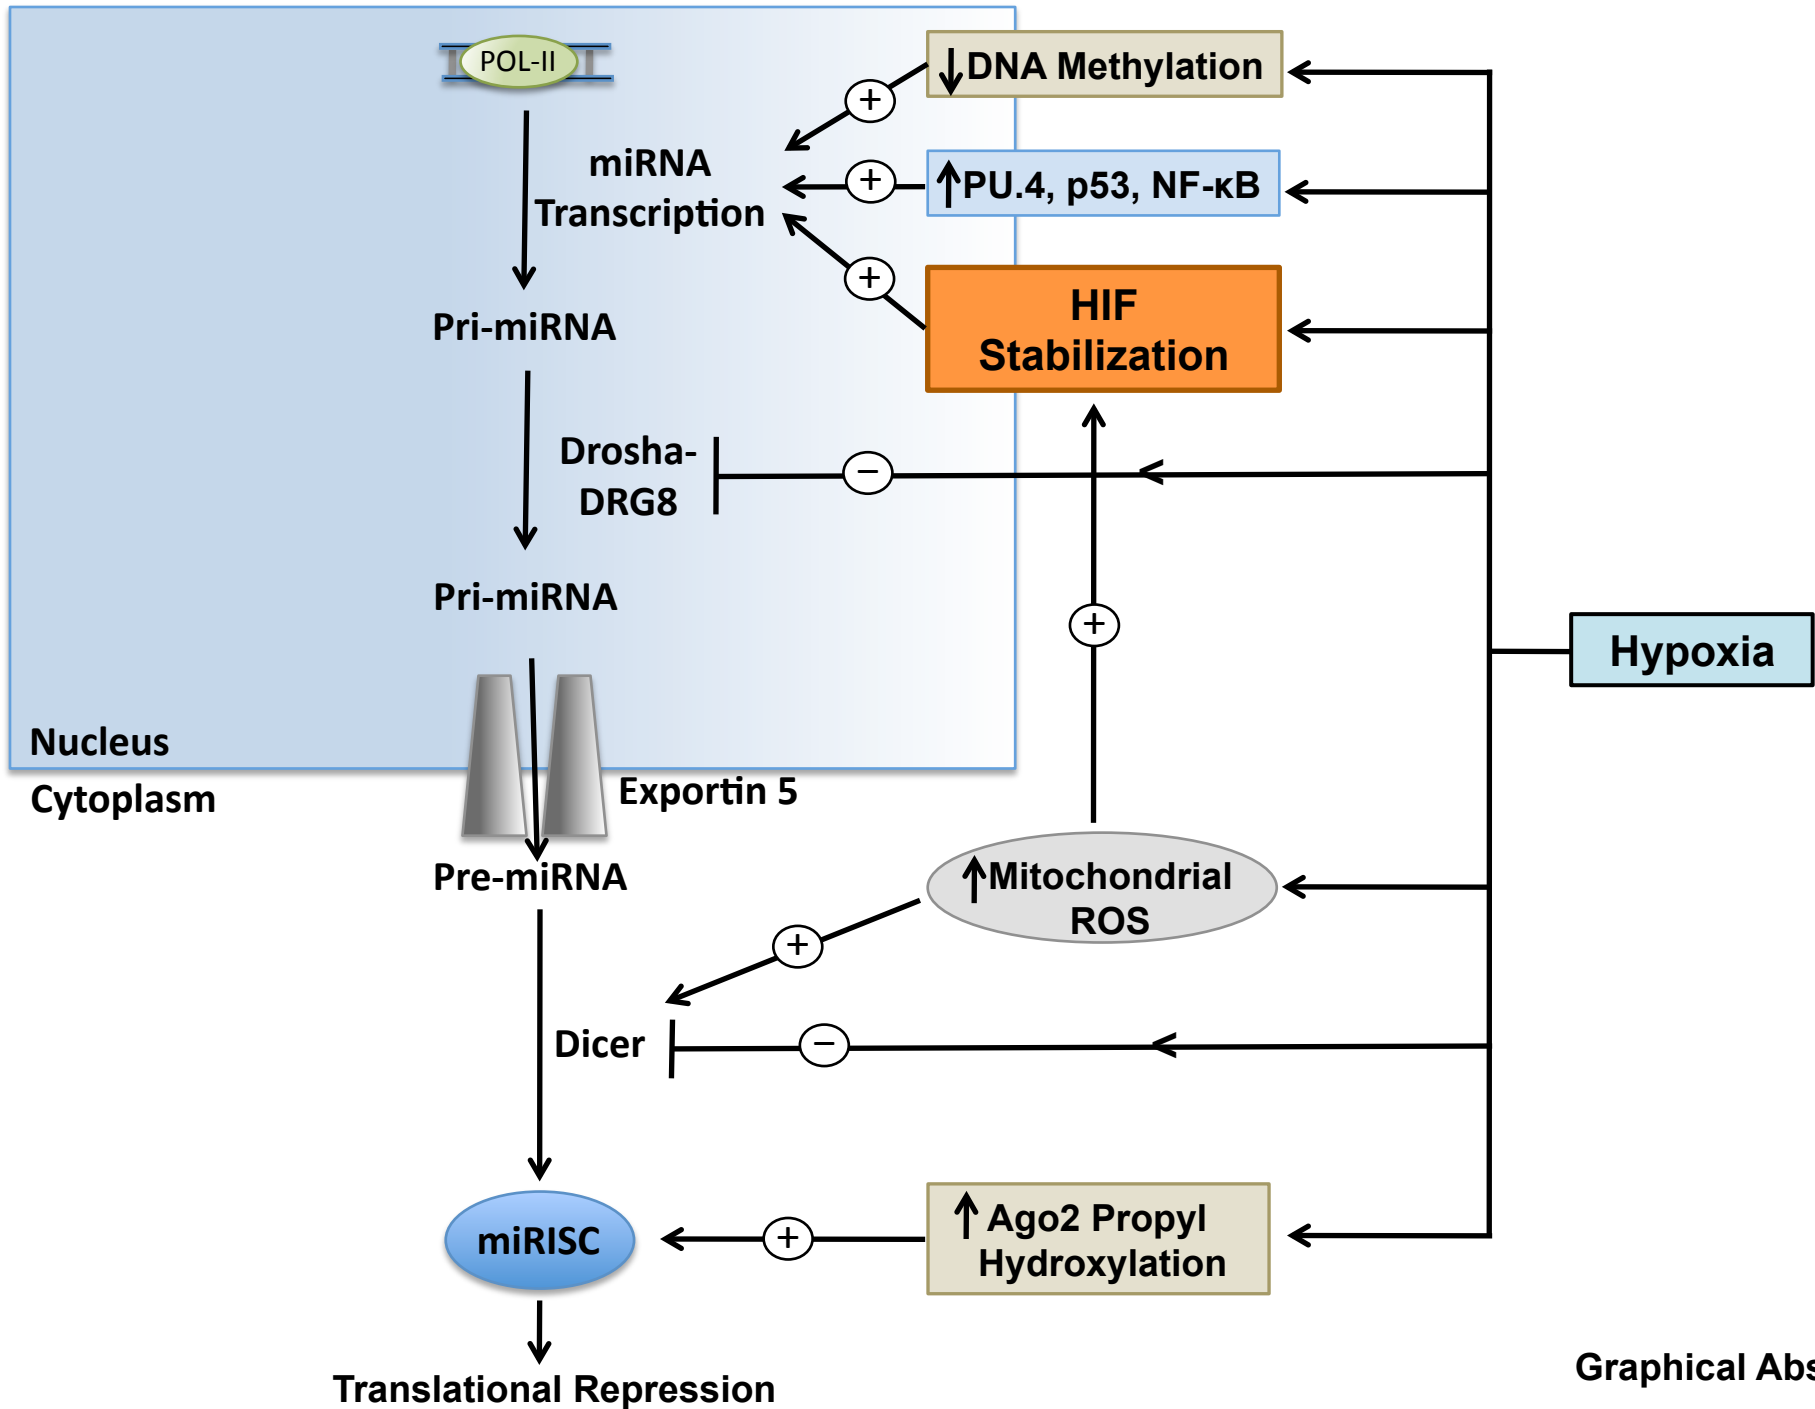

Graphical Abstract

Supplement: NIHMS483848-supplement-Graphical_abstract.pdf [file NIHMS483848-supplement-Graphical_abstract.pdf]
